# Supplementary material
Source: Springer Nature journal article supplement (https://www.springermedizin.de/resource/supplementary/12943_2009_480_MOESM7_ESM.pdf/9554390)

**a**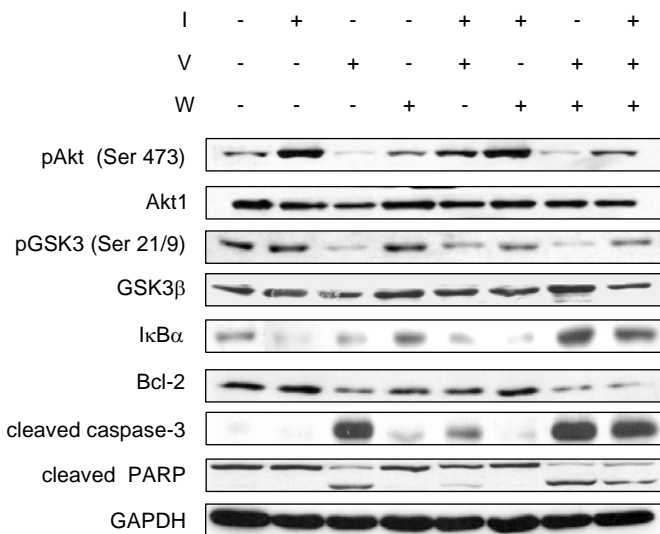**b**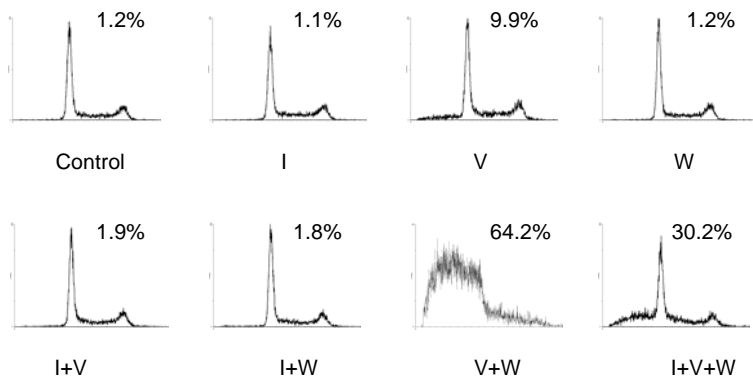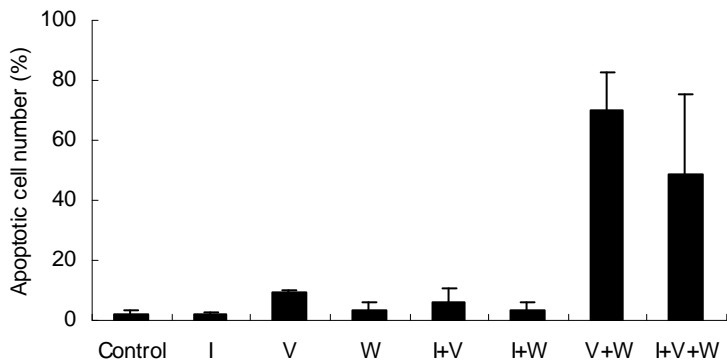

Supplement: MOESM7 [file 9554390]
